# Supplementary material for: A Model Instability Issue in the NCEP Global Forecast System Version 16 and Potential Solutions
Source: Copernicus journal article supplement (doi:10.5194/egusphere-2022-1235), 2023-01-30
Supplement: Supplementary file [file egusphere-2022-1235-AC2-supplement.pdf]

Reply:

Thank you for the excellent summary of our work. Your summary accurately and concisely captured the key aspects and conclusions we would like to address in our manuscript. We revised the manuscript carefully according to your comments and suggestions. The following is our point-to-point replies:

**Details:**

- 1) Lines 62-64: avoid 1-sentence paragraphs  
The paragraphs was revised, more details were added.
- 2) Line 97: quoted number of grid points is incorrect, should read 768 x 768  
Corrected.
- 3) Lines 116-125: This section contains a discussion about sponge-layer diffusion mechanisms near the model top and triggers the impression that the crashes are caused by processes near the model top. However, later only the three lowest model levels are analyzed. Clarify where is crashes are triggered in this section. In addition, clarify why the discussion of the spongelaye diffusion settings are relevant for the analysis in this paper. If they have no relevance, this needs to be clearly stated.  
This paragraph was revised. We tuned many tunable available parameters to stabilize the model. Although some of the cases were able to finish 16-day forecasts, not all of them became stable with these tuned parameters, indicating that further improvements were needed to address the model stability issue. That's why we looked into the model results and found the problem is actually located near the model lower boundary.
- 4) Line 124: this point is related to the previous point. What does 'not completely' mean here? It reads as if there were examples when the modification of the sponge-layer mechanisms were able to prevent the crash, but this was not a reliable modification. Clarify this.  
We clarified that in the manuscript. Although some of the cases were able to finish 16-day forecasts, not all of them became stable with these tunings. It indicates that further improvements are needed to address the model stability issue.
- 5) Line 140 and many others: A sentence cannot start with the abbreviation 'Fig. XX ...', use the word 'Figure' at the beginning of sentences.  
Corrected
- 6) Fig. 2, Fig. 3, Fig. 7, and definitions in the text (line 286): clarify whether level 1 is at the surface or the model top, e.g. are the vertical levels counted downwards or upwards? Figures 2 and 3 suggest that level 1 is at the surface, but Fig. 7 reverses the order of the levels and shows level 127 at the bottom (surface?). This also has implications for the computation of the layer thickness  $dz$ , as e.g. defined in line 289. If layer 1 is the lowest as indicated by Figs. 2 and 3, then the definition of the height thickness becomes negative as also shown in Fig.4e. However, throughout the manuscript the impression is triggered that the height thickness is a positive quantity since its thresholds  $dz_{min}$  (line 253, 255) are always quoted as positive thresholds. This is contradicted by the positions of the lowest and second/third lowest model levels in (also in Figs. 5 and 6) that show that the geopotential height of the lowest level is indeed near the surface (providing negative thicknesses according to line 299). There is general confusion about the sign of  $dz$  which needs to be remedied. The line-up of the vertical levels needs to be unified in Figs. 2/3 and 7.

Figure 2 and 3 are revised. The level 1 is the model top as in the model. Figs. 2 & 3 are revised to be consistent with Fig. 7.  $Dz$  in fig 4e is changed to be positive in order to be consistent with the manuscript “height thickness”,  $dz_{min}$  et al.

7) The confusion about the level count for the vertical levels also has implications for the legends in Figs. 4, 5, and 6. If level 1 is the lowest level, it is very confusing to name the second lowest level  $km-1$  in the Fig. 4 legend. It should read  $km+1$  in this case. There is general confusion how the legends of these three figures refer to the levels. In Fig. 4, the labels ‘ $km$ ’, ‘ $km-1$ ’, ‘ $km-2$ ’ are used for the lowest, second lowest and third lowest levels, respectively. Note that there is a typo in Fig. 4b, that lists ‘ $km$ ’ twice and leaves out  $km-1$ . However, in Figs. 5 and 6 the labels change to ‘ $km+1$ ’ for the lowest level (was  $km$  before), ‘ $km$ ’ for the second lowest (was  $km-1$ ) and ‘ $km-1$ ’ for the third lowest (was  $km-2$ ). If ‘ $km$ ’ denotes the total number of levels like 127 in Fig. 4, then level 127 is located at the surface in contradiction to Figs. 2 and 3 and level numbers decrease upwards. This all needs to be made consistent with unified legends and a unique way how levels are counted.

Fig4b label was corrected. The lowest level is defined with  $N$ , the second and third lowestest level are define by  $N-1$ ,  $N-2$  in the labels. If there are total  $N$  layers in the model, there are  $N+1$  levels interface. The captions for Fig5 and 6 are revised to clarify. “ $km$  “ in Figs.5 and 6 are revised to “ $N$ ” too.

8) Figures 2 and 3 contain confusing x-axis labels. What are the label J-grid and I-grid? Switch to some readable labels like ‘latitudes’ or ‘longitudes’. Do these figures show cross sections along interpolated latitudes or longitudes, or data along cubed-sphere coordinates? The captions of Fig. 2 and 3 need to list the physical unit of  $w$ . clarify whether this is the vertical height velocity or vertical pressure velocity. I assume it is the height velocity, but die to the missing unit this is not clear.

The x-axis labels are revised to  $X$  and  $Y$  with the reference distance with kilometer (KM) from the crash grid. The data is along cubed-sphere coordinate. The vertical velocity in Figs 2 and 3 is  $m/s$ , which is added in Figs. 2 and 3 captions.

9) Line 175-176: inaccurate definition of the symbols  $dz$  and  $p^*$ .  $dz$  is defined as the layer height, but this is the symbol for the layer thickness. Explain how the layer thickness is computed and whether it is negative or positive. Line 175 needs to state the physical meaning of the symbol ‘ $w$ ’ for clarity. In addition, the symbol  $p^*$  is incorrectly defined as the hydrostatic layer thickness, but  $p^*$  symbolizes the hydrostatic pressure (not the thickness). The symbol  $dp^*$  needs to be used for the hydrostatic pressure thickness.

The definition of  $dz$  and  $p^*$  are corrected.  $dz$  is layer thickness and  $p^*$  is hydrostatic pressure.  $W$  is vertical velocity.

10) Line 178: all symbols in Eq. (1) need to be explained including  $R_d$ ,  $m$ ,  $z$  and  $g$ . Is  $R_d$  the moist or dry gas constant

The definition of these variables are added.

11) Line 211 needs to explain the definition of the symbol  $dm$ . Again, is this considered a positive or negative quantity in connection with  $dz$ ? In Fig. 4c,  $dm$  is positive, but  $dz$  is negative in Fig. 4e which renders a quantity like  $dm/dz$  negative. A negative quantity like this will not work for the computation of the pressure in Eq. (1), leading to imaginary parts. If the authors insist on these sign conventions, Eq. (1) seems to be wrong.

Dz in Fig4 is changed to positive value.

12) Line 218: should read '0-200'

This is rewritten to avoid confusing. "0" changed to zero

13) Figs, 4, 5, 6 captions: specify which test case this is and refer to the location of the circle in Fig. 1 (which subfigure?)

Figs 4,5,6 are for the case corresponding to Fig.1a. The initial time of this case is specified in figure caption.

14) Fig. 4b: it is unusual to plot pressure from lower pressure to higher pressure along the y-axis. The higher pressure is at the lower location, so the pressure axis needs to be reversed starting from the higher pressure decreasing along the y-axis.

Y-axis in Fig.4a is flipped following your suggestion.

15) Fig. 4c, the title of the plot 'mass' and the caption are incorrect. This is  $dm$  and not  $m$ . Correct. The physical unit  $kg/s^2$  does not make sense. Do you mean  $kg/m^2$ ?

The mass unit is corrected. It should be  $kg/m^2$ .

16) Fig. 4d: The values for the virtual potential temperature in the range 11-16.5 (which physical unit? units are omitted, add the units) do not make physical sense. Potential temperatures near the surface lie around 300 K depending on location. It is likely that there is another (sloppy) oversight when defining the symbol  $q_v$ . It is not the actual virtual potential temperature, but a scaled version of it. The definition needs to be shown when referring to it in line 184.

The definition of the virtual potential temperature used in FV3 is added after line 190. FV3 use a reference pressure 1 pa.

17) Fig 4: all legends are too small, enlarge the font size and line thickness

Fig. 4 is replotted to have larger font and clear lines.

18) Figs. 5 and 6: specify the physical unit along the y-axis.

Title for fig 5 and 6 is added in the figure.

19) Lines 323: here, the layer numbering suggests that level 1 is at the top of the atmosphere since its boundary condition is described as the 'upper' boundary condition. As specified earlier, this all needs to be remedied.

Revised.

20) Fig. 7: Does 'K' denote the level number? This is undefined. The ordering switches in comparison to Figs. 2 and 3 with the level number 127 at the bottom (surface?). This needs to be cleaned up (see also the earlier comments).

The y-axis label "K" is changed to "vertical level". The model level from top to surface has been clarified.

21) Line 374: what is the modification? Specify it to make the test reproducible.

Instead of assuming a small Earth, the idealized mountain-ridge experiment was tested on a doubly-periodic domain. Specific details of the experiments are introduced in the manuscript.

22) Fig. 8c: the color range looks inadequate, but maybe there are tiny (invisible) points that range over this scale. Clarify. The caption states that the x-axis has units of degrees, but the actual axis label states 'km'. Correct this inconsistency. Add the physical units.

X-axis is in km, the caption is corrected. The color scale in Fig8c is revised.

23) Line 386: does this implementation utilize a sponge layer near the model top? If yes, describe it.

Two forms of damping are applied at the top. These two damping methods are discussed in the manuscript now.

24) Line 400: An analysis is discussed, but no figure or scores are provided. Is this intentional or an oversight? If no figure was planned state '(not shown)'.

"not shown" is stated.

25) Line 409 typo 'zerio'

corrected

26) Lines 507 and 509: The phrases 'NOAA-EMC/global-workflow at gfs.v16.2.2 (github.com)' and 'Index of /data/nccf/com/gfs/prod (noaa.gov)' look like links, but they are not functional.

Correct this.

The links are fixed

27) Line 541: Point to the newer version of the Harris et al FV3 model description (Technical document from June 2021). The provided link leads to an empty page. It is incorrect to also state that this was published in J. Adv. Model Earth Sys.,12 (10), 2020b (remove the journal name)

Corrected.

28) Lines 525 & 584: incomplete references, both needs the location and conference dates.

Capitalize fv3gfs and fv3.

Locations and conference dates are added.

29) Figs. 4, 5, 6, 7 are rather fuzzy and of low quality. Improve the quality.

Figs 4, 5 6 7 are replotted.
